# Supplementary material for: Paroxetine protects against bleomycin-induced pulmonary fibrosis by blocking GRK2/Smad3 pathway
Source: publisher site journal article supplement (doi:10.18632/aging.205092), 2023-10-09
Supplement: Supplementary file [file aging-v15i19-205092-supplementary-material-SD1.pdf]

## SUPPLEMENTARY FIGURE

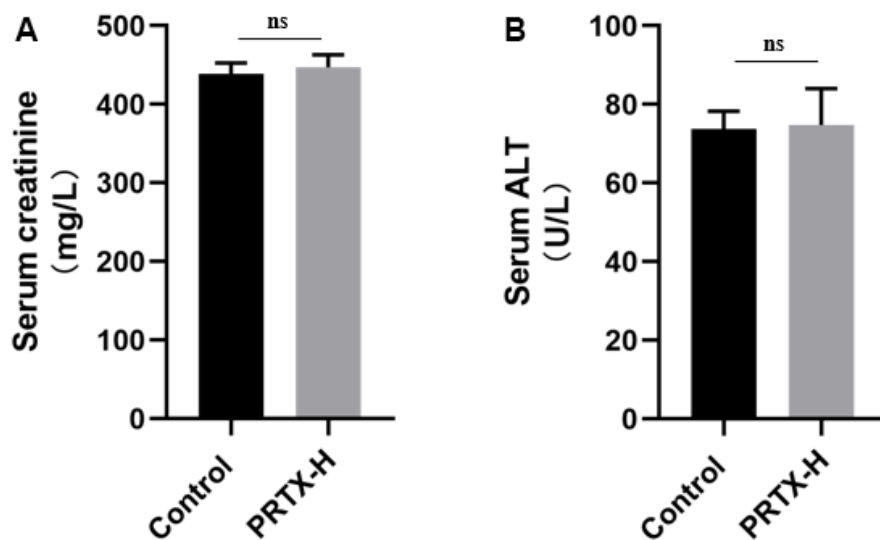

**Supplementary Figure 1. The effects of PRTX-H treatment on hepatic and renal function.** (A) Serum creatinine level in mice, (n=5). (B) Serum alanine aminotransferase (ALT) level in mice, (n=5). \* $P < 0.05$  vs. the Control group, PRTX-H, Paroxetine-High dose ( $7.5 \text{ mg}\cdot\text{kg}^{-1}\cdot\text{day}^{-1}$ ).
