# Supplementary material for: Paroxetine protects against bleomycin-induced pulmonary fibrosis by blocking GRK2/Smad3 pathway
Source: publisher site journal article supplement (doi:10.18632/aging.205092), 2023-10-09
Supplement: Supplementary file [file aging-v15i19-205092-supplementary-material-SD2.pdf]

## SUPPLEMENTARY TABLE

**Supplementary Table 1. The primers used in the study.**

| <b>Species</b> | <b>Gene</b>         | <b>Forward primer</b>   | <b>Reverse primer</b>     |
|----------------|---------------------|-------------------------|---------------------------|
| Mice           | <i>Tgf-β</i>        | ACGTAGTGCTGATGCCAAC     | ATGATCGATCGATGATGGTAC     |
| Mice           | <i>Collagen-I</i>   | AATGATGCTAGTACGTACCA    | CCCGTAGTAGTCGACCTAGTCAC   |
| Mice           | <i>Collagen-III</i> | TGGTCGTAGTGTCGTGACCA    | AGTCGTAGTCGTGTAACGTAGC    |
| Mice           | <i>α-Sma</i>        | CTGTAGTGTGTCGTACCACC    | CCCGTGATGTCGTAGTCGTAGTCGT |
| Mice           | <i>Grk2</i>         | TGTAGTCGATGTGTAGCACAC   | GGTGCTAGTCGATGAACACC      |
| Mice           | <i>Smad2</i>        | TGATCGTACGTAGTGATGCCCA  | TCGTCGATCGATCGATCAGCAC    |
| Mice           | <i>Smad3</i>        | CCCCTGATGTCACGTGTAC     | TCCATGTGTGCACTTAAGAACCGG  |
| Mice           | <i>Smad4</i>        | ACTGATCGTAGTAGTGTGATGC  | TGTCGTGACCCTAGTGATCGAC    |
| Mice           | <i>Txn-1</i>        | CTAGTCGTAGATGCTAAGTCA   | CTGATGATGCTGATAGATGCTGA   |
| Mice           | <i>Txnrd1</i>       | AACTGATGTCGTAGTCGTAGA   | ACGTAGTCGTAGTGCTGTAAC     |
| Mice           | <i>Gpx4</i>         | ATGTCGTAGTCGTGATGTCGTA  | CTAGTCGTAAGATGCTAACCAC    |
| Mice           | <i>Gapdh</i>        | ACTCCTGATGCTAGCTGTGTACA | ACGTGTAGTCGTACCACCCAC     |
